# Supplementary material for: Upregulation of the oestrogen target gene SIX1 is associated with higher growth speed and decreased survival in HCV-positive women with hepatocellular carcinoma
Source: PubMed Central journal article supplement — Oncol Lett. 2022 Sep 21;24(5):395. doi: 10.3892/ol.2022.13515 (PMC9533365; doi:10.3892/ol.2022.13515), 2022-09-21
Supplement: Supplementary_Data2.pdf [file Supplementary_Data2.pdf]

Table SI. Differentially expressed genes in HCV-positive F and M patients. Genes are listed in order of decreasing significance order. For the first 76 genes, the difference is significant (P<0.05).

| Gene            | FC (F) | FC (M) | P-value |
|-----------------|--------|--------|---------|
| SIX1            | 6,7    | 4,8    | <0.001  |
| JARID1C         | 8,8    | 8,2    | <0.001  |
| NR1H4           | 10,7   | 11,2   | 0.005   |
| SOCS4           | 3,9    | 3,5    | 0.007   |
| CCNE2           | 3,7    | 2,6    | 0.007   |
| NR1I3           | 10,6   | 11,8   | 0.008   |
| LASS3           | 1,7    | 1,5    | 0.008   |
| POTED           | 2,5    | 2,2    | 0.008   |
| UBE2S           | 10,5   | 9,9    | 0.008   |
| MT1B            | 13,3   | 14,5   | 0.009   |
| EXOSC9          | 10,0   | 9,7    | 0.010   |
| C15orf42        | 7,1    | 6,3    | 0.010   |
| ERCC6L          | 5,1    | 4,2    | 0.010   |
| MT1E            | 6,0    | 7,4    | 0.012   |
| AP4M1           | 8,1    | 7,8    | 0.012   |
| NDC80           | 4,0    | 3,4    | 0.013   |
| TMEM195         | 10,6   | 11,1   | 0.015   |
| GSK3A           | 11,9   | 11,7   | 0.016   |
| ARG1            | 14,1   | 15,3   | 0.017   |
| USP1            | 10,5   | 10,2   | 0.017   |
| LMNB2           | 7,5    | 7,0    | 0.018   |
| PPIA            | 12,4   | 12,3   | 0.019   |
| ZBED4           | 6,8    | 6,5    | 0.019   |
| MED22           | 7,9    | 7,5    | 0.020   |
| ADH1C           | 14,7   | 15,6   | 0.022   |
| LYPLA2P1        | 7,6    | 7,3    | 0.022   |
| SGOL1           | 5,3    | 4,7    | 0.022   |
| RFWD3           | 7,3    | 7,0    | 0.023   |
| SKAP1           | 9,9    | 10,7   | 0.023   |
| SLC44A1         | 9,5    | 10,0   | 0.023   |
| POTEB           | 3,2    | 2,6    | 0.023   |
| LOC388503       | 13,1   | 14,0   | 0.024   |
| PTTG3           | 5,5    | 4,9    | 0.024   |
| SMG5            | 11,3   | 10,9   | 0.026   |
| PLG             | 12,3   | 13,4   | 0.027   |
| HELLS           | 5,8    | 5,1    | 0.027   |
| ENST00000378252 | 1,2    | 1,6    | 0.027   |

|              |      |      |       |
|--------------|------|------|-------|
| MKI67        | 5,2  | 4,4  | 0.027 |
| MT1F         | 9,5  | 11,0 | 0.027 |
| SLC17A1      | 7,7  | 8,7  | 0.027 |
| SLC17A3      | 9,2  | 10,0 | 0.027 |
| CYP2C19      | 9,7  | 10,6 | 0.027 |
| CDT1         | 7,5  | 7,0  | 0.028 |
| CEP97        | 3,8  | 3,2  | 0.029 |
| PYGO2        | 10,9 | 10,5 | 0.031 |
| CKAP2        | 8,6  | 8,2  | 0.031 |
| NEU1         | 11,9 | 11,6 | 0.032 |
| CDC2         | 8,3  | 7,5  | 0.032 |
| GPR19        | 4,5  | 3,8  | 0.032 |
| PRC1         | 9,6  | 8,9  | 0.032 |
| LOC100129113 | 9,2  | 10,0 | 0.032 |
| BC044845     | 5,6  | 6,4  | 0.032 |
| HIG2         | 9,9  | 9,5  | 0.032 |
| ALDH2        | 13,2 | 13,8 | 0.033 |
| ECT2         | 5,9  | 5,5  | 0.034 |
| FBL          | 14,3 | 14,0 | 0.037 |
| AZGP1        | 13,7 | 14,2 | 0.037 |
| RUNDC2B      | 5,9  | 6,5  | 0.037 |
| SLCO1A2      | 2,4  | 3,1  | 0.039 |
| A_24_P84711  | 5,8  | 5,0  | 0.040 |
| DTL          | 7,5  | 6,8  | 0.041 |
| KIFC1        | 7,1  | 6,3  | 0.044 |
| C20orf132    | 6,6  | 7,2  | 0.045 |
| CENPM        | 6,4  | 5,6  | 0.045 |
| PAK1         | 8,3  | 7,8  | 0.045 |
| MLF1IP       | 8,7  | 8,2  | 0.046 |
| RAD54L       | 7,3  | 6,6  | 0.046 |
| AF116657     | 1,3  | 1,4  | 0.046 |
| B4GALT3      | 10,7 | 10,5 | 0.047 |
| UHRF1        | 7,4  | 6,7  | 0.047 |
| GABARAPL3    | 9,0  | 9,4  | 0.047 |
| SLCO1B1      | 11,5 | 12,1 | 0.047 |
| PCCB         | 11,8 | 12,1 | 0.049 |
| C1orf67      | 6,6  | 6,2  | 0.049 |
| SLC6A13      | 7,7  | 9,0  | 0.049 |
| AK127132     | 7,2  | 6,9  | 0.051 |
| AW205421     | 4,8  | 3,9  | 0.051 |

|            |      |      |       |
|------------|------|------|-------|
| AW235110   | 9,4  | 9,9  | 0.051 |
| ANLN       | 6,0  | 5,1  | 0.052 |
| CLDN3      | 10,8 | 10,4 | 0.053 |
| AASS       | 7,8  | 8,5  | 0.053 |
| SLC7A1     | 2,9  | 2,4  | 0.053 |
| HMGB2      | 11,4 | 10,9 | 0.054 |
| PFKFB1     | 8,3  | 9,3  | 0.055 |
| THC2720561 | 4,5  | 4,0  | 0.056 |
| POLD1      | 9,7  | 9,4  | 0.057 |
| LPAL2      | 9,5  | 10,5 | 0.058 |
| LEPR       | 8,6  | 9,7  | 0.058 |
| SNRPD1     | 10,8 | 10,4 | 0.058 |
| NUF2       | 7,4  | 6,8  | 0.058 |
| ZWINT      | 8,8  | 8,3  | 0.058 |
| GBP7       | 8,5  | 9,7  | 0.058 |
| LPA        | 8,3  | 9,0  | 0.059 |
| CBX3       | 13,2 | 13,0 | 0.060 |
| FBF1       | 6,8  | 6,5  | 0.060 |
| NOLC1      | 9,9  | 9,5  | 0.060 |
| AMDHD1     | 11,8 | 12,5 | 0.060 |
| TOP2A      | 7,6  | 6,6  | 0.062 |
| EZH2       | 10,1 | 9,7  | 0.062 |
| APCS       | 13,4 | 14,1 | 0.063 |
| BC019356   | 7,6  | 8,0  | 0.063 |
| THC2617292 | 10,2 | 10,4 | 0.063 |
| GLT25D1    | 9,0  | 8,8  | 0.063 |
| OS9        | 10,6 | 11,0 | 0.065 |
| KIF18B     | 5,7  | 4,8  | 0.065 |
| NHLRC3     | 9,4  | 9,7  | 0.065 |
| GYS2       | 6,3  | 7,0  | 0.068 |
| SLC2A9     | 8,1  | 9,2  | 0.068 |
| ARL6IP6    | 8,2  | 7,9  | 0.069 |
| CENPA      | 5,7  | 4,9  | 0.069 |
| PHYHD1     | 9,5  | 10,3 | 0.070 |
| AI281523   | 6,8  | 6,7  | 0.073 |
| SLBP       | 10,8 | 10,6 | 0.075 |
| ASPM       | 9,3  | 8,6  | 0.079 |
| SFRS3      | 13,0 | 12,8 | 0.079 |
| C20orf108  | 11,8 | 12,1 | 0.079 |
| THC2729730 | 12,5 | 13,2 | 0.081 |

|            |      |      |       |
|------------|------|------|-------|
| KIF2C      | 8,7  | 8,1  | 0.081 |
| SLC7A11    | 2,1  | 2,0  | 0.084 |
| DEPDC1     | 2,7  | 2,2  | 0.085 |
| MAT1A      | 14,8 | 15,2 | 0.086 |
| OVOS2      | 6,1  | 5,6  | 0.087 |
| YWHAE      | 9,6  | 9,8  | 0.090 |
| SHMT1      | 10,9 | 11,6 | 0.090 |
| GPSM2      | 3,5  | 2,8  | 0.090 |
| THC2723388 | 4,6  | 4,0  | 0.090 |
| PDE11A     | 6,4  | 7,2  | 0.090 |
| H2AFZ      | 11,9 | 11,6 | 0.093 |
| PDSS2      | 9,0  | 9,3  | 0.093 |
| CDC25A     | 3,7  | 3,1  | 0.094 |
| BIRC5      | 10,3 | 9,6  | 0.095 |
| LOC120364  | 9,0  | 8,8  | 0.097 |
| ZFP1       | 7,2  | 7,7  | 0.097 |

F, female; M, male; FC, fold change.
